# Supplementary material for: Synergistic effect of bimetallic PdAu nanocrystals on oxidative alkyne homocoupling
Source: Royal Society of Chemistry journal article supplement (doi:10.1039/c8cc06744a), 2018-01-01
Supplement: c8cc06744a1.pdf [file c8cc06744a1.pdf]

## Supporting Information

### Synergistic Effect of Bimetallic PdAu Nanocrystals on Oxidative Alkyne Homocoupling

#### Experimental Details

##### Preparation for PdAu nanocrystals:

In a typical preparation of PdAu(1:1) nanocrystals, 0.1 g L<sup>-1</sup> aqueous HAuCl<sub>4</sub> (270 ml) and Pd(acac)<sub>2</sub> (10 mg) were dissolved in OAm (10 mL) at 60 °C under vigorous stirring for 10 min. Then, a solution of borane-tert-butylamine (100 mg, 1.15 mmol) in OAm (1 mL) was added quickly into the previous solution, and the reaction mixture immediately turned black. After 1 min, the flask was heated to 80 °C for a further 1 h. After cooling to room temperature, the solution was washed with ethanol (40 mL×3) and then dispersed in cyclohexane for future use. The PdAu nanocrystals with other metal ratios were synthesized in the similar way but use related stoichiometric precursors. The pure Pd and Au nanocrystals were synthesized by using single precursor source.

##### Preparation for mpg-C<sub>3</sub>N<sub>4</sub>:

5 g of cyanamide and 12.5 g of Ludox-HSO<sub>4</sub> silica dispersion are mixed together until complete dissolution of cyanamide. The mixture is heated in an oil bath at 100 °C upon stirring for ca .3h until removal of water and formation of a white solid. The powder is then grounded in a mortar, transferred into a crucible and heated under air at 2.3 °C min<sup>-1</sup> (4h) up to 550 °C and then treated at 550 °C for 4h. The as-obtained yellow powder is grounded in a mortar and then treated under stirring during 2 days in a NH<sub>4</sub>HF<sub>2</sub> 4 mol L<sup>-1</sup> solution. The dispersion is then filtered; the precipitate is washed with distilled water and ethanol. After filtering, the yellow compound is dried under vacuum at 100 °C overnight.

##### Preparation for NCs/mpg-C<sub>3</sub>N<sub>4</sub>:

For the preparation of Pd/mpg-C<sub>3</sub>N<sub>4</sub>, PdAu/mpg-C<sub>3</sub>N<sub>4</sub>, and Au/mpg-C<sub>3</sub>N<sub>4</sub> catalysts, mpg-C<sub>3</sub>N<sub>4</sub> is added into the dispersions of Pd, PdAu, and Au at a loading of 2 wt. % (based on Pd and Au), and the mixtures are stirred overnight. The catalysts are obtained through centrifugation and drying under vacuum.

##### Typical procedure for catalyzing oxidative homocoupling of phenylacetylene:

1mmol phenylacetylene is dissolved in 5ml DMF in air condition, 50 mg NPs/ mpg-C<sub>3</sub>N<sub>4</sub> catalyst (2 mmol% based on total metal) is mixed with the reactant, then the solution is stirred at 80 °C (or 100 °C) for 12 hours, the conversion and selectivity are determined by GC using biphenyl as internal

##### Materials Characterization:

The Powder XRD patterns is recorded by a Bruker D8 ADVANCE X-ray powder diffractometer with CuKα radiation (λ=1.5406 Å). The sample compositions are determined by EDX, and the particle size and dispersion are investigated with a Hitachi H-800 transmission electron microscope (TEM).

X-ray photoelectron spectroscopy (XPS) is conducted with a Thermo Fisher ESCALAB 250Xi spectrometer equipped with a monochromatic Al X-ray source.

Supplementary Figures:

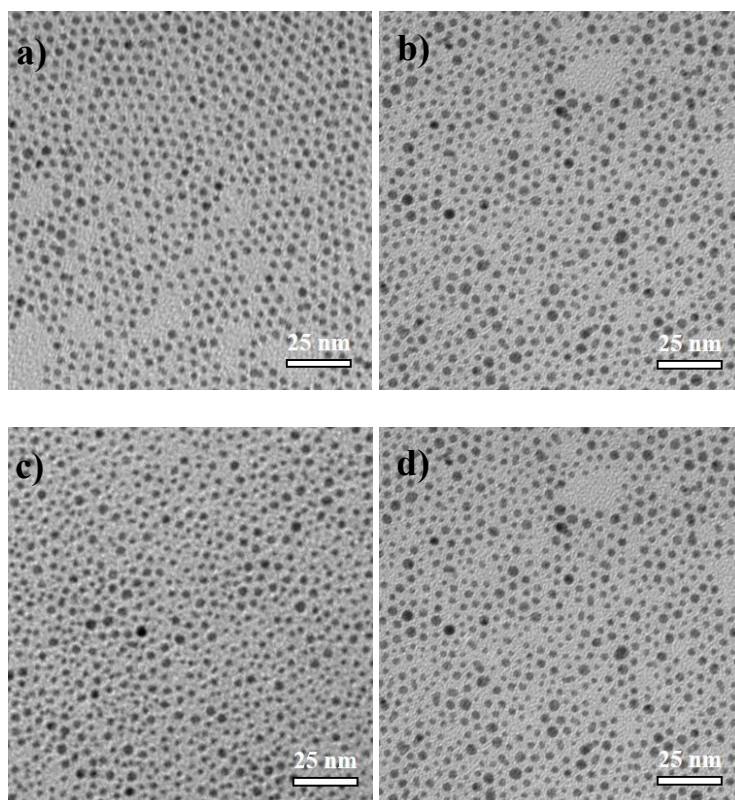

Fig. S1 TEM images of Pd<sub>3</sub>Au (a), Pd<sub>2</sub>Au (b), PdAu<sub>2</sub> (c), PdAu<sub>3</sub> (d).

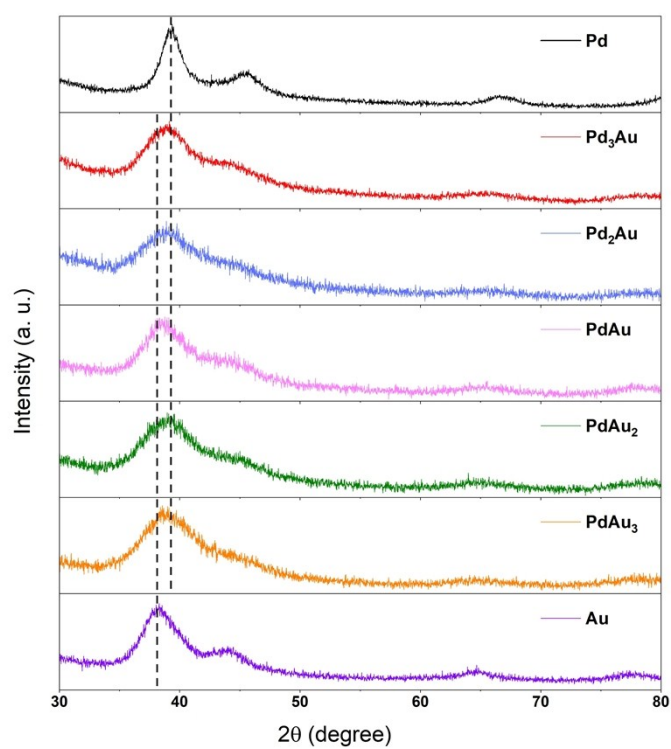

Fig. S2 The XRD patterns of all metallic NPs, the dash lines indicate the (111) peak positions of Pd and Au

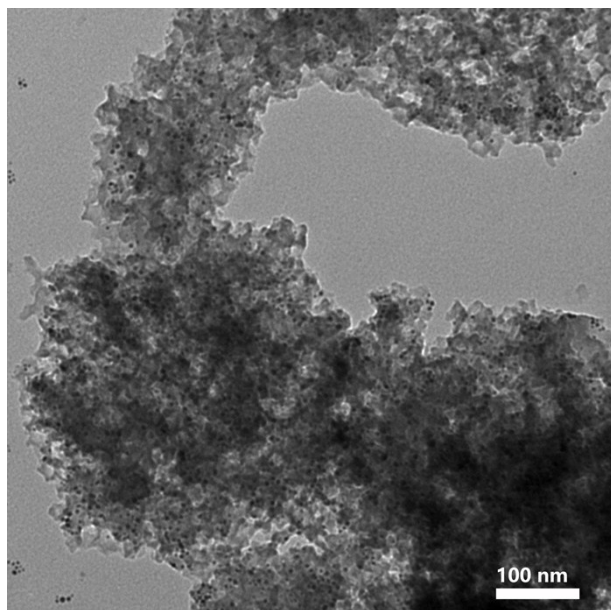

Fig. S3 TEM image of PdAu/mpg-C<sub>3</sub>N<sub>4</sub>

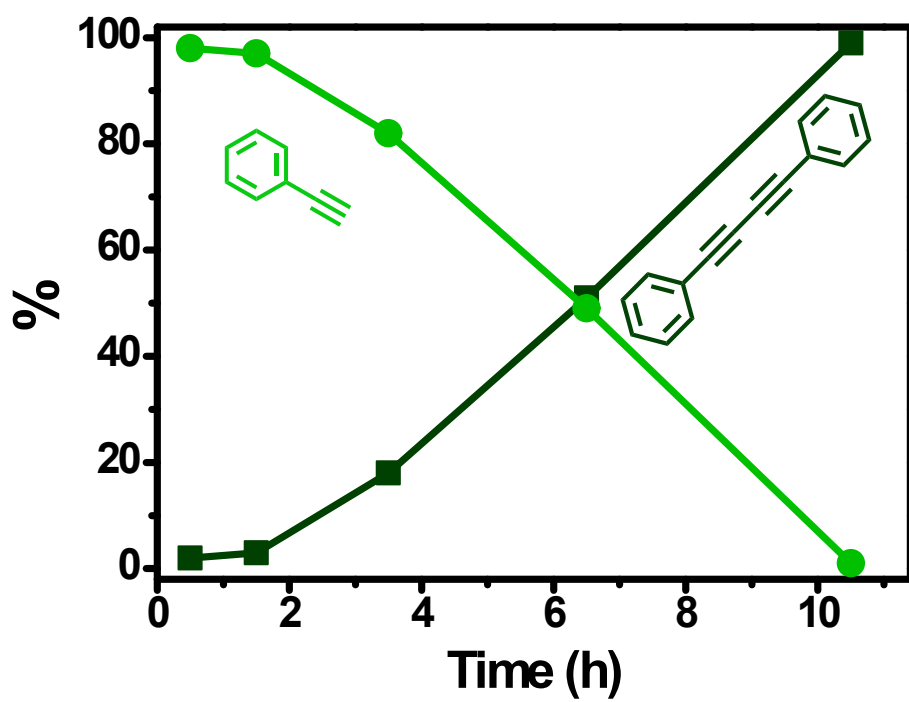

Fig. S4 The ratios of substrate and product versus reaction time.

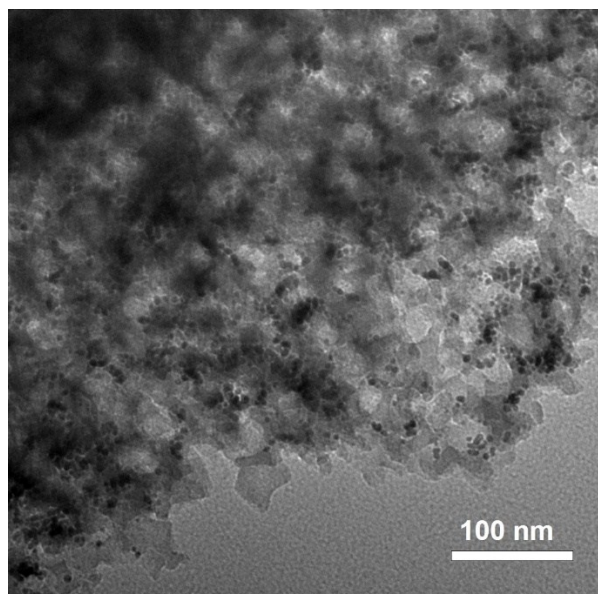

Fig. S5 TEM image of PdAu/mpg-C<sub>3</sub>N<sub>4</sub> after five cycles.

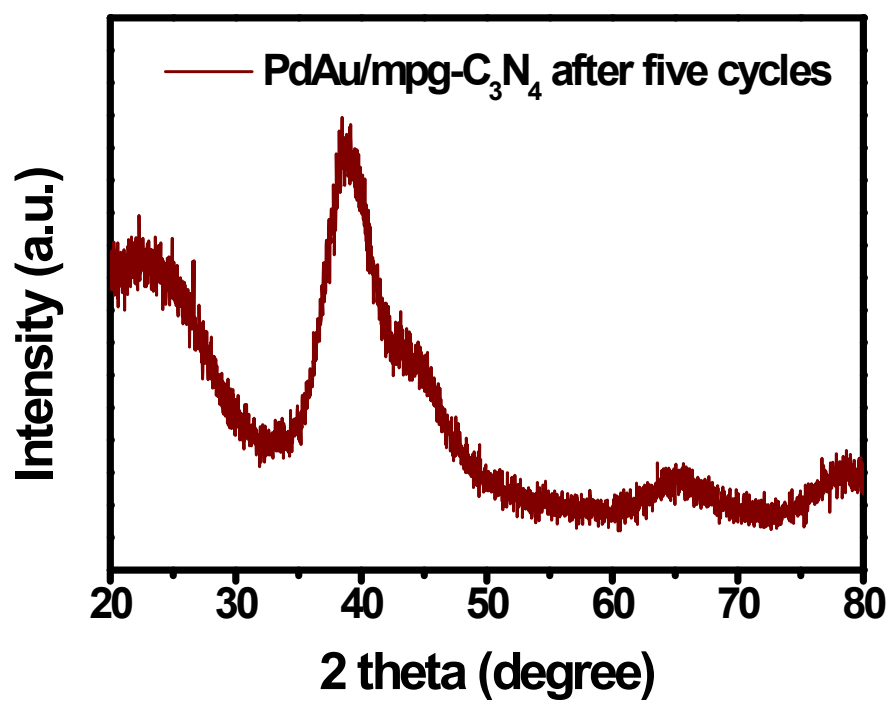

Fig. S6 XRD pattern of PdAu/mpg-C<sub>3</sub>N<sub>4</sub> after five cycles.

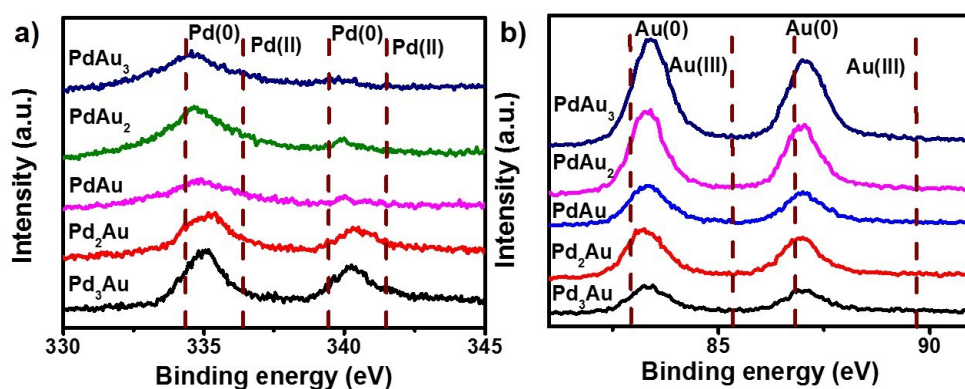

Fig. S7 XPS characterization of PdAu/mpg-C<sub>3</sub>N<sub>4</sub> with different metal ratios about Pd 3d and Au 4f spectra.

#### Supplementary Tables:

**Table S1** Oxidative homocoupling of phenylacetylene over various heterogeneous catalysts.

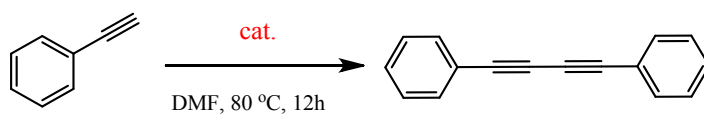

| Entry <sup>a)</sup> | Catalysts <sup>b)</sup>           | Yields (%) <sup>c)</sup> | Selectivity (%) <sup>d)</sup> |
|---------------------|-----------------------------------|--------------------------|-------------------------------|
| 1                   | Pd                                | 2.2                      | >99                           |
| 2                   | Au                                | -                        | -                             |
| 3                   | Pd + Au                           | 6.3                      | >99                           |
| 4                   | Pd <sub>3</sub> Au                | 61                       | 79                            |
| 5                   | Pd <sub>2</sub> Au                | 78.9                     | >99                           |
| 6                   | PdAu                              | 41                       | >99                           |
| 7                   | PdAu <sub>2</sub>                 | 11                       | >99                           |
| 8                   | PdAu <sub>3</sub>                 | -                        | -                             |
| 9                   | Mpg-C <sub>3</sub> N <sub>4</sub> | -                        | -                             |

a) phenylacetylene: 1mmol, DMF: 5ml, air, catalyst: 50mg with 12h; b) catalyst: 2% mmol based on metal (Pd and Au); c) determined by GC using biphenyl as internal; d) other products: benzaldehyde/acetophenone.

**Table S2** Oxidative homocoupling of phenylacetylene over Pd<sub>2</sub>Au loaded on different supports

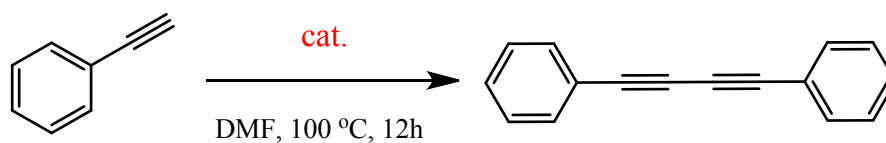

| Entry <sup>a)</sup> | Support <sup>b)</sup>          | Yields (%) <sup>c)</sup> | Selectivity (%) <sup>d)</sup> |
|---------------------|--------------------------------|--------------------------|-------------------------------|
| 1                   | C <sub>3</sub> N <sub>4</sub>  | 100                      | >99                           |
| 2                   | TiO <sub>2</sub>               | 42.9                     | >99                           |
| 3                   | ZnO                            | 31.7                     | >99                           |
| 4                   | SiO <sub>2</sub>               | 83.1                     | >99                           |
| 5                   | C                              | 91.2                     | >99                           |
| 6                   | Fe <sub>3</sub> O <sub>4</sub> | 58.9                     | >99                           |
| 7                   | CeO <sub>2</sub>               | 31.5                     | 76.1                          |

a) phenylacetylene: 1mmol, DMF: 5ml, air, catalyst: 50mg with 12h; b) different catalyst: 2% mmol based on metal (Pd and Au); c) determined by GC using biphenyl as internal; d) other products: benzaldehyde/acetophenone.

a
